# Supplementary material for: Risk factors for exacerbations and pneumonia in patients with chronic obstructive pulmonary disease: a pooled analysis
Source: Springer Nature journal article supplement (doi:10.1186/s12931-019-1262-0), 2020-01-06
Supplement: MOESM4 [file 17691966]

**Additional file 4** Survival curves (95% CI bands) from selected pneumonia model showing probability of first exacerbation during year on study treatment

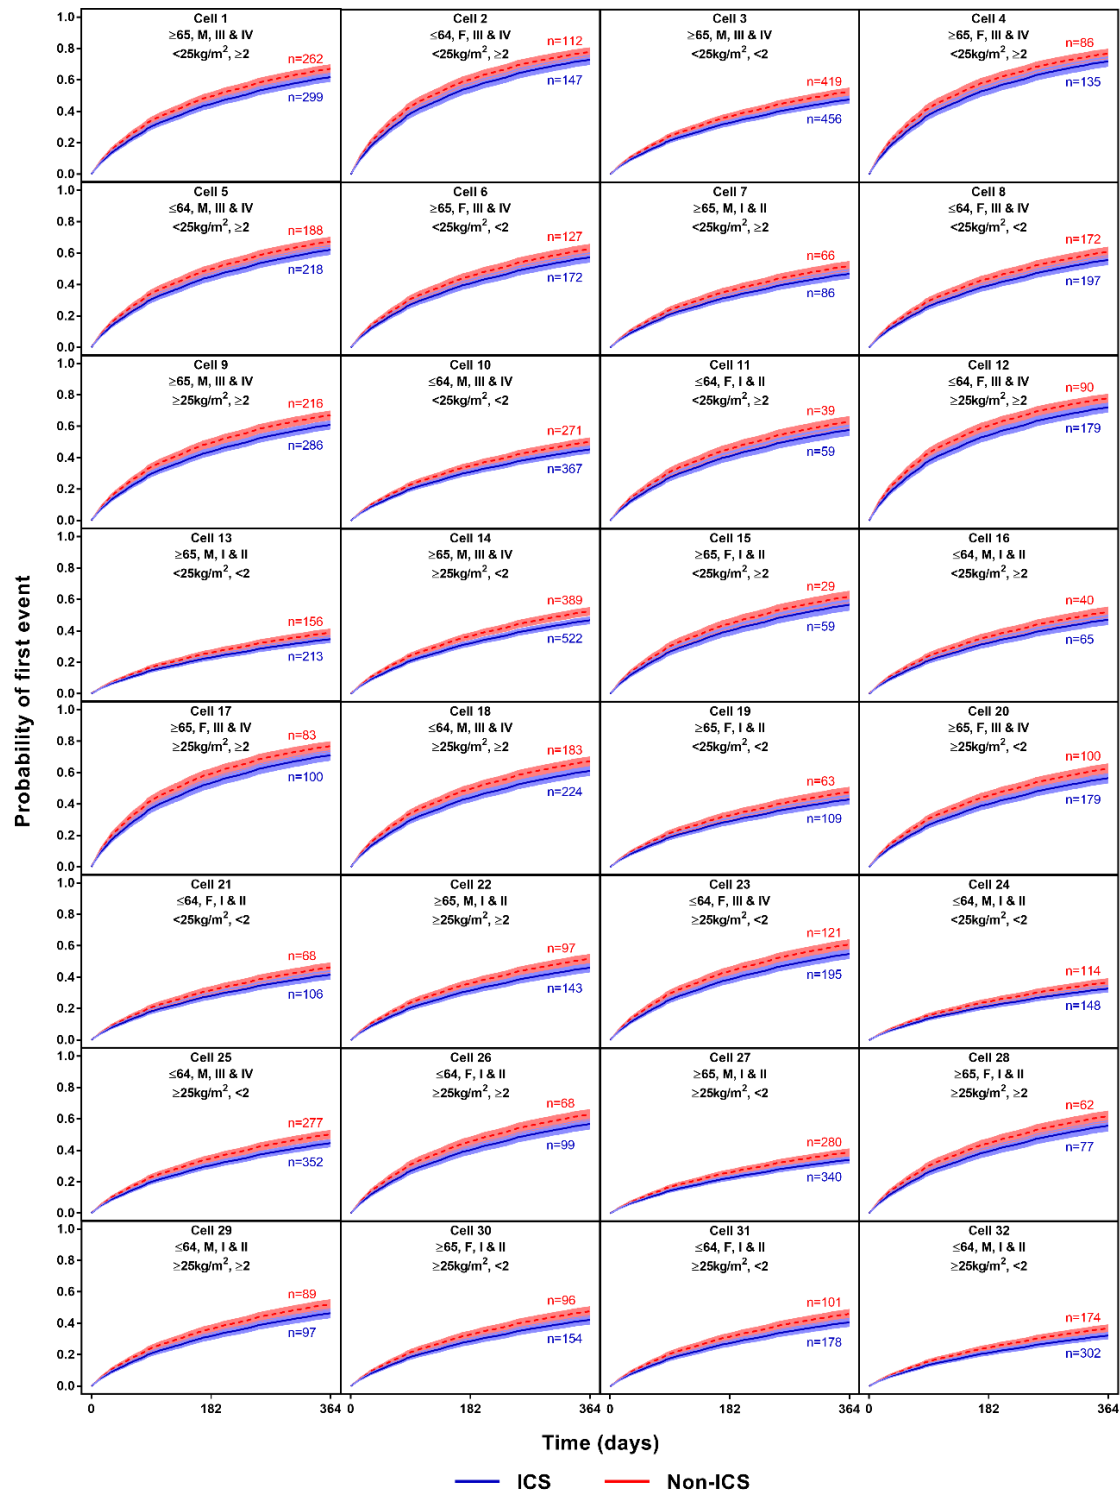

Cell header line 1: Age (years), gender, Global Initiative for Chronic Obstructive Lung Disease stage; Cell header line 2: Body mass index, number of exacerbations (<2, ≥2) in the prior year. Numbers of patients presented are subgroup numbers, patients without covariates did not contribute to the model. CI confidence interval, ICS inhaled corticosteroid
